# Supplementary material for: Gestational Pesticide Exposure and Child Respiratory Health
Source: PubMed Central journal article supplement (PMC7579149; doi:10.3390/ijerph17197165), 2020-09-30
Supplement: ijerph-17-07165-s001.pdf [file ijerph-17-07165-s001.pdf]

## Supplementary Materials

**Table S1.** Odds ratios and p values from logistic regression analyses examining contributions of maternal pesticide metabolite concentration during pregnancy and the interactions of these exposures with maternal daily fresh fruit and vegetable consumption, and *PON1*<sub>-108</sub> and *PON1*<sub>192</sub> alleles to child wheeze.

| Wheeze                 | Direct |          | <i>Fr/Veg</i><br>(ref <daily) |          | <i>PON1</i> <sub>-108</sub><br>(ref QR/RR) |          | <i>PON1</i> <sub>192</sub><br>(ref CC) |          |           |           |
|------------------------|--------|----------|-------------------------------|----------|--------------------------------------------|----------|----------------------------------------|----------|-----------|-----------|
|                        | OR     | <i>p</i> | OR                            | <i>p</i> | OR                                         | <i>p</i> | OR                                     | <i>p</i> | <i>CT</i> | <i>TT</i> |
| Wheeze age 8 years†    |        |          |                               |          |                                            |          |                                        |          |           |           |
| DE                     | 1.25   | 0.108    | 1.30                          | 0.710    | 0.43                                       | 0.005    | 0.84                                   | 0.510    | 2.94      | 0.096     |
| DM                     | 1.06   | 0.652    | 1.22                          | 0.495    | 0.50                                       | 0.079    | 0.58                                   | 0.046    | 2.08      | 0.181     |
| DAP                    | 1.13   | 0.402    | 1.21                          | 0.542    | 0.40                                       | 0.036    | 0.53                                   | 0.057    | 2.81      | 0.091     |
| 3PBA                   | 0.99   | 0.918    | 0.74                          | 0.038    | 0.898                                      | 0.652    | 0.84                                   | 0.310    | 0.64      | 0.078     |
| Any wheeze to 8 years‡ |        |          |                               |          |                                            |          |                                        |          |           |           |
| DE                     | 0.99   | 0.394    | 0.98                          | 0.362    | 0.86                                       | 0.138    | 0.85                                   | 0.547    | 0.50      | 0.749     |
| DM                     | 1.00   | 0.324    | 0.96                          | 0.159    | 0.86                                       | 0.134    | 0.90                                   | 0.337    | 1.10      | 0.638     |
| DAP                    | 0.92   | 0.284    | 1.22                          | 0.213    | 0.87                                       | 0.405    | 1.05                                   | 0.755    | 1.50      | 0.129     |
| 3PBA                   | 0.99   | 0.800    | 0.74                          | 0.007    | 0.85                                       | 0.198    | 0.82                                   | 0.118    | 0.73      | 0.141     |

DE = diethyl phosphate, DM = dimethyl phosphate, DAP = dialkyl phosphate, 3PBA = pyrethroid (3-Phenoxybenzoic acid); Direct analyses include no covariates.

Covariates in the logistic regression models, except the direct models, predicting wheeze at age 8 years were child's birth weight and sex, mother's age at delivery, employment, education, alcohol consumption, parity, and daily fruit and vegetable consumption.

Covariates in the generalized linear mixed models, except the direct models, predicting any wheeze at ages to 8 years were child's birth weight and sex, and mother's age at delivery, education, employment, parity, alcohol consumption and daily fruit and vegetable consumption during pregnancy.

**Table 2.** Correlations of maternal pesticide metabolite concentration with predicted FEV1 at 4 ( $n = 155$ ) and 5 years ( $n = 197$ ).

|                                |             | <b>DAP</b> | <b>DE</b> | <b>DM</b> | <b>3PBA</b> |
|--------------------------------|-------------|------------|-----------|-----------|-------------|
| Percent Predicted FEV1 4 Years | Correlation | 0.21       | 0.004     | -0.008    | -0.06       |
|                                | <i>p</i>    | (0.008)    | (0.9615)  | (0.92)    | (0.49)      |
| Percent Predicted FEV1 5 Years | Correlation | -0.02      | -0.008    | 0.03      | 0.03        |
|                                | <i>p</i>    | (0.83)     | (0.91)    | (0.66)    | (0.66)      |

DAP=dialkyl phosphate, DE=diethyl phosphate, DM=dimethyl phosphate, 3PBA = pyrethroid.
